# Supplementary material for: Preterm Birth—A Risk Factor for Type 2 Diabetes?
Source: Oxford University Press journal article supplement (doi:10.2337/dc10-0912), 2010-09-07
Supplement: dc100912onlineappendix.pdf [file dc100912onlineappendix.pdf]

**Supplemental Table 1. Characteristics of the subjects with and without diabetes, as defined by special reimbursement for medication for diabetes.**

|                                                    | Diabetes*<br>652 (5.1%) | No diabetes*<br>12079 | P value<br>( $\chi^2$ or t test) | Data<br>missing |
|----------------------------------------------------|-------------------------|-----------------------|----------------------------------|-----------------|
| Sex                                                |                         |                       | <0.0001                          | 0               |
| Men                                                | 432 (6.5%)              | 6206                  |                                  |                 |
| Women                                              | 220 (3.6%)              | 5873                  |                                  |                 |
| Mother's BMI before delivery (kg/m <sup>2</sup> )† | 26.4 (3.1)              | 26.2 (2.9)            | 0.03                             | 1229            |
| Birth weight (g)†                                  | 3348 (486)              | 3405 (477)            | 0.003                            | 0               |
| Relative birth weight (SD) †‡                      | -0.17 (1.00)            | 0.01 (1.00)           | <0.0001                          | 0               |
| Year of birth                                      | 1940.4                  | 1940.7                | 0.02                             | 0               |
| Length of gestation                                |                         |                       | 0.004                            | 0               |
| <35 weeks                                          | 21 (8.5%)               | 226                   |                                  |                 |
| 35 to <37 weeks                                    | 19 (3.5%)               | 530                   |                                  |                 |
| 37 to <42 weeks                                    | 534 (5.0%)              | 10177                 |                                  |                 |
| ≥42 weeks                                          | 78 (6.4%)               | 1146                  |                                  |                 |
| Parity                                             |                         |                       | 0.5                              | 5               |
| Firstborn                                          | 327 (5.2%)              | 5928                  |                                  |                 |
| Not firstborn                                      | 323 (5.0%)              | 6148                  |                                  |                 |
| Father's occupational status§                      |                         |                       | <0.0001                          | 335             |
| Manual worker                                      | 422 (5.8%)              | 6821                  |                                  |                 |
| Lower middle class                                 | 136 (4.5%)              | 2868                  |                                  |                 |
| Upper middle class                                 | 79 (3.7%)               | 2070                  |                                  |                 |

\* Data on medication for diabetes are based on special reimbursement, granted on the basis of a physician reviewing each case history.

† Mean (SD)

‡ Relative birth weight = birth weight adjusted for length of gestation by linear regression, expressed in SD units

§ Highest occupational status as obtained from birth, child welfare clinic and school healthcare records
